# Supplementary material for: Unravelling the true MOF-5 luminescence
Source: Royal Society of Chemistry journal article supplement (doi:10.1039/d0ra02509g), 2020-01-01
Supplement: d0ra02509g2.pdf [file d0ra02509g2.pdf]

## Supporting information

“Unraveling of the true MOF-5 luminescence”

Vincent Villemot<sup>a</sup>, Matthieu Hamel<sup>a</sup>, Robert B. Pansu<sup>b</sup>, Isabelle Leray<sup>b</sup>, Guillaume H. V. Bertrand<sup>a\*</sup>

<sup>a</sup> CEA, LIST, Laboratoire Capteurs et Architectures Électroniques, F-91191, Gif-sur-Yvette Cedex, France

<sup>b</sup> ENS Paris Saclay, UMR CNRS 8531, F-94235, Cachan, France

|                                                   |   |
|---------------------------------------------------|---|
| 1. Metal-Organic Framework synthesis              | 3 |
| 2. Single crystal X-Ray diffraction               | 4 |
| 3. Powder X-Ray diffraction                       | 5 |
| 4. Thermogravimetric analysis (TGA)               | 5 |
| 5. Raman                                          | 5 |
| 6. N <sub>2</sub> Adsorption                      | 5 |
| 7. Photoluminescence                              | 5 |
| 8. Time correlated single photon counting (TCSPC) | 5 |

**Figure S1.** TGA of activated MOF-5.

**Figure S2.** Raman spectra of MOF-5 in DMF (black) and without after 68h (red).

**Figure S3.** Isotherm (top), surface BET plot (middle) and cumulative surface area (bottom) of MOF-5 (black) and partially hydrated MOF-5 (blue)

**Figure S4.** TCSPC of H<sub>2</sub>BDC dissolved in DMSO and MOF-5 impregnated with DMSO showing similar lifetime of 1.5 ns.

**Figure S5.** TCSPC of H<sub>2</sub>BDC dissolved in DMF and MOF-5 impregnated with DMF showing similar lifetime of 1.5 ns

**Figure S6.** Decay time measurements of hydrated MOF-5 (blue), partially hydrated MOF-5 (red) observed at 350 and 450 nm and MOF-5 soaked in DMF (black).

**Figure S7.** Perrin-Jablonsky diagram

**Figure S8.** Decay time measurements of solid H<sub>2</sub>BDC (purple), Na<sub>2</sub>BDC (red), H<sub>2</sub>BDC dilute in DMF (black) and activated MOF-5 (blue).

**Figure S9.** Surface normalized intensity showing an isobestic point at  $\lambda = 410$  nm

**Figure S10.** Excitation (dashed) and emission (straight) PL spectra of H<sub>2</sub>BDC diluted in DMF.

**Figure S11.** Excitation (dashed) and emission (straight) PL spectra of H<sub>2</sub>BDC diluted in DMSO.

**Figure S12.** Excitation (dashed) and emission (straight) PL spectra of H<sub>2</sub>BDC diluted in DCM.

## 1. Metal-Organic Framework synthesis

### Reagents

Zinc nitrate hexahydrate (Alfa Aesar, 99%), benzene-1,4-dicarboxylic acid (Sigma Aldrich, 98%), *N,N*-Diethylformamide (VWR, reagent grade), *N,N*-Dimethylformamide (VWR, reagent grade), Anhydrous *N,N*-Dimethylformamide (VWR, Anhydrous max. 0.005% H<sub>2</sub>O), Anhydrous Dichloromethane (VWR, Anhydrous max. 0.005% H<sub>2</sub>O) were used as received without further purification.

### Synthesis of MOF-5

Zinc nitrate hexahydrate Zn(NO<sub>3</sub>)<sub>2</sub>•6H<sub>2</sub>O (1.77 g, 5.9 mmol) and benzene-1,4-dicarboxylic acid (329 mg, 1.9 mmol) were dissolved in 50 mL of *N,N*-diethylformamide (DEF). The mixture was removed by syringe and injected through a 13 mm syringe filter (0.45 μm PTFE) into ten 20 mL scintillation vials which were then sealed with a screw cap. The vials were placed in an oven at 75 °C for ten days yielding millimeter sized MOF-5 single crystals. The closed vials were removed and placed in a N<sub>2</sub> glovebox.

### Activation

#### *1. Classical activation*

Single crystals MOF-5 were washed three times with anhydrous DMF. The resulting sample was then washed three times with anhydrous dichloromethane. Activation was realized at 70 °C under reduced pressure and sample were placed in glovebox for further analysis.

#### *2. Supercritical CO<sub>2</sub> activation*

Single crystals MOF-5 were washed three times with anhydrous DMF. Activation was realized through supercritical CO<sub>2</sub> using a Tousimis Samdri-PVT-3D and sample were placed in glovebox for further analysis.

## 2. Single crystal X-Ray diffraction

A translucent colourless parallelepiped-like specimen of  $C_{24}H_{12}O_{13}Zn_4$ , approximate dimensions 0.124 mm x 0.137 mm x 0.152 mm, was used for the X-ray crystallographic analysis. The X-ray intensity data were measured ( $\lambda = 0.71073 \text{ \AA}$ ).

A total of 939 frames were collected. The total exposure time was 2.61 hours. The frames were integrated with the Bruker SAINT software package using a narrow-frame algorithm.

Table 1. Single crystal data

|                                            |                                                                                           |                                                                  |
|--------------------------------------------|-------------------------------------------------------------------------------------------|------------------------------------------------------------------|
| <b>Chemical formula</b>                    | $C_{24}H_{12}O_{13}Zn_4$                                                                  |                                                                  |
| <b>Formula weight</b>                      | 769.82 g/mol                                                                              |                                                                  |
| <b>Temperature</b>                         | 220(2) K                                                                                  |                                                                  |
| <b>Wavelength</b>                          | 0.71073 $\text{\AA}$                                                                      |                                                                  |
| <b>Crystal size</b>                        | 0.124 x 0.137 x 0.152 mm                                                                  |                                                                  |
| <b>Crystal habit</b>                       | translucent colourless parallelepiped                                                     |                                                                  |
| <b>Crystal system</b>                      | cubic                                                                                     |                                                                  |
| <b>Space group</b>                         | Fm $\bar{3}$ m                                                                            |                                                                  |
| <b>Unit cell dimensions</b>                | a = 25.8107(9) $\text{\AA}$<br>b = 25.8107(9) $\text{\AA}$<br>c = 25.8107(9) $\text{\AA}$ | $\alpha = 90^\circ$<br>$\beta = 90^\circ$<br>$\gamma = 90^\circ$ |
| <b>Volume</b>                              | 17194.9(18) $\text{\AA}^3$                                                                |                                                                  |
| <b>Z</b>                                   | 8                                                                                         |                                                                  |
| <b>Density (calculated)</b>                | 0.595 g/cm <sup>3</sup>                                                                   |                                                                  |
| <b>Absorption coefficient</b>              | 1.123 mm <sup>-1</sup>                                                                    |                                                                  |
| <b>F(000)</b>                              | 3040                                                                                      |                                                                  |
| <b>Theta range for data collection</b>     | 2.23 to 25.63°                                                                            |                                                                  |
| <b>Index ranges</b>                        | -29 ≤ h ≤ 31, -31 ≤ k ≤ 31, -31 ≤ l ≤ 31                                                  |                                                                  |
| <b>Reflections collected</b>               | 64578                                                                                     |                                                                  |
| <b>Independent reflections</b>             | 878 [R(int) = 0.1669]                                                                     |                                                                  |
| <b>Coverage of independent reflections</b> | 99.7%                                                                                     |                                                                  |
| <b>Absorption correction</b>               | Multi-Scan                                                                                |                                                                  |
| <b>Max. and min. transmission</b>          | 0.7471 and 0.6052                                                                         |                                                                  |
| <b>Structure solution technique</b>        | direct methods                                                                            |                                                                  |
| <b>Structure solution program</b>          | SHELXT 2014/5 (Sheldrick, 2014)                                                           |                                                                  |
| <b>Refinement method</b>                   | Full-matrix least-squares on F <sup>2</sup>                                               |                                                                  |
| <b>Refinement program</b>                  | SHELXL-2018/3 (Sheldrick, 2018)                                                           |                                                                  |
| <b>Function minimized</b>                  | $\sum w(F_o^2 - F_c^2)^2$                                                                 |                                                                  |
| <b>Data / restraints / parameters</b>      | 878 / 0 / 25                                                                              |                                                                  |
| <b>Goodness-of-fit on F<sup>2</sup></b>    | 1.119                                                                                     |                                                                  |
| <b>Final R indices</b>                     | 596 data; $I > 2\sigma(I)$                                                                | R1 = 0.0619, wR2 = 0.1692                                        |
|                                            | all data                                                                                  | R1 = 0.0883, wR2 = 0.1831                                        |
| <b>Weighting scheme</b>                    | $w = 1 / [\sigma^2(F_o^2) + (0.1021P)^2 + 46.1761P]$<br>where $P = (F_o^2 + 2F_c^2) / 3$  |                                                                  |
| <b>Largest diff. peak and hole</b>         | 0.556 and -0.338 e $\text{\AA}^{-3}$                                                      |                                                                  |
| <b>R.M.S. deviation from mean</b>          | 0.067 e $\text{\AA}^{-3}$                                                                 |                                                                  |

### 3. Powder X-Ray diffraction

Single crystalline samples were gently crushed on a sample holder.

PXRD data was collected on a Bragg Brentano diffractometer (Siemens D5000) equipped with Cu K $\alpha$  X-Ray source operating at 40 kV and 40 mA. Diffraction data was collected in a  $\theta$ -2 $\theta$  geometry through a 2 $\theta$  range of 3°-50° with step size of 0.03° and a 5 s acquisition.

### 4. Thermogravimetric analysis (TGA)

Approximately 5 – 10 mg sample was used for thermogravimetric analysis. The sample was analyzed under a stream of argon using a Perkin Elmer TGA4000 from room temperature up to 600 °C with a scan rate of 1 °C.min<sup>-1</sup>.

### 5. Raman

Raman spectra were collected at room temperature, using a WiTec alpha 300R confocal Raman microscope with a UHTS300 spectrometer and a DV401A CCD detector. The laser beam spot size was around 900nm. MOF-5 and MOF-5 t+68h were illuminated using a frequency doubled Nd:YAG Laser at 532 nm and Raman signal was collected in a backscattering geometry.

### 6. N<sub>2</sub> Adsorption

MOFs were degassed under vacuum for 3 hours at 100°C. Adsorption–desorption isotherms were then recorded at 77 K with a Micrometrics ASAP 2010 volumetric analyser using N<sub>2</sub> as adsorptive. The surface area and pore diameter were deduced from these measurements using the Brunauer–Emmet–Teller (BET) and micropore analysis (MP) methods. Micropore area was determined by the t-plot method

### 7. Photoluminescence

Dilute solution of H<sub>2</sub>BDC were prepared and filled in supra quartz cuvette. MOF-5 single crystal was placed in quartz capillary in N<sub>2</sub> glovebox and excess solvent wicked. Capillary was then sealed to avoid any moisture degradation. Activated MOF-5, Na<sub>2</sub>BDC and H<sub>2</sub>BDC were squeezed between two quartz slides into the glovebox.

PL data was collected on a Horiba Jobin-Yvon FluoroLog-3 fluorescence spectrometer at the right angle and appropriate filter to avoid lamp diffusion. Slit widths of 3 nm (excitation) and 3 nm (emission) were used for dilute solution of H<sub>2</sub>BDC. Larger slit widths of 4 nm and 4 nm, and smaller slits widths of 1.5 nm and 1.5 nm were used for single crystal and powder samples, respectively. Acquisition was fixed at 1 s to increase the SNR (Signal to Noise Ratio). PL data for moisture degradation was collected at the right angle between 330 and 550 nm with 110 s delay between each measurement.

### 8. Time correlated single photon counting (TCSPC)

Samples for TCSPC were prepared as previously described for PL measurements.

Fluorescent lifetimes are obtained using TCSPC method. Excitation is made by a femtosecond TiSa laser pumped by a Nd:YVO<sub>4</sub> laser. The repetition rate can be tuned up to 4 MHz. Harmonic generator permits to assess a 300 nm excitation. Pulses were focused on the sample at the appropriate angle and collected by a monochromator at the desired wavelength. Filtered emission was detected with a microchannel plate photomultiplier tube (R3809U-50, Hamamatsu) connected to TCSPC board (SPC 630, Becker & Hickl). Data were normalized with instrumental response subtracted and fit using mono or biexponential decay.

$$EQ(1) : y = y_0 + a_1 e^{-(x-x_0)/\tau_1} + a_2 e^{-(x-x_0)/\tau_2}$$

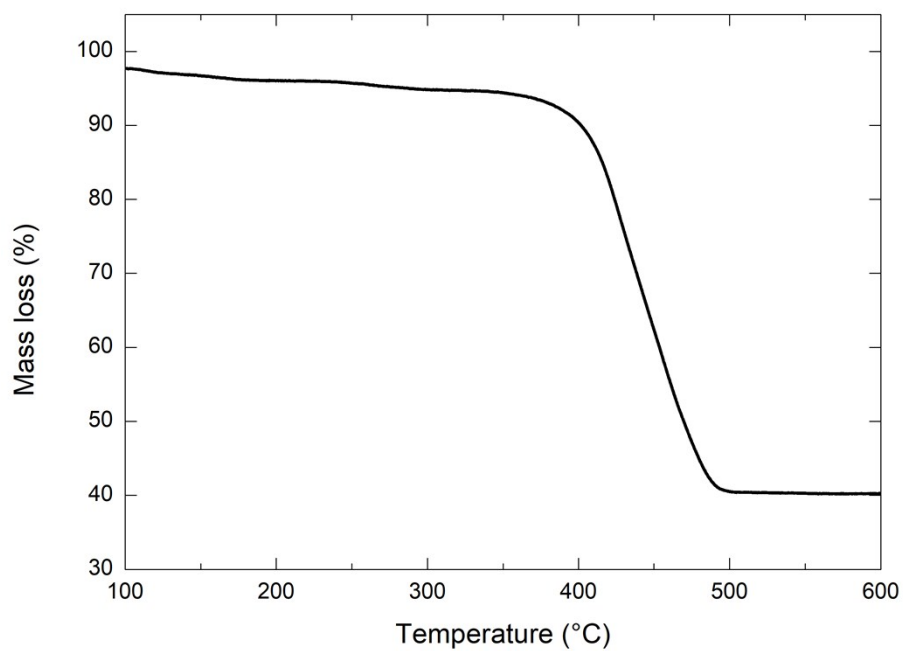

**Figure S1.** TGA of activated MOF-5.

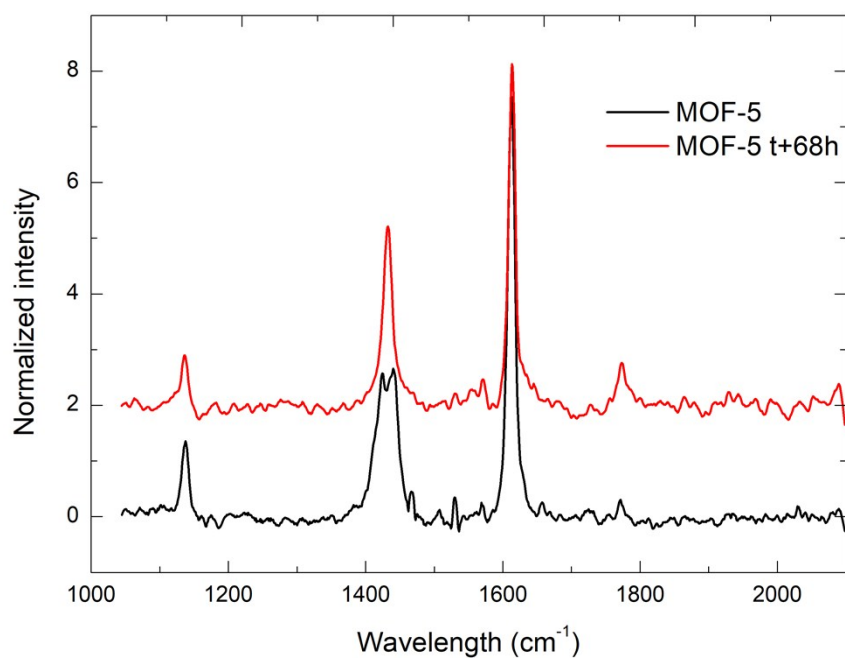

**Figure S2.** Raman spectra of MOF-5 in DMF (black) and without after 68h (red).

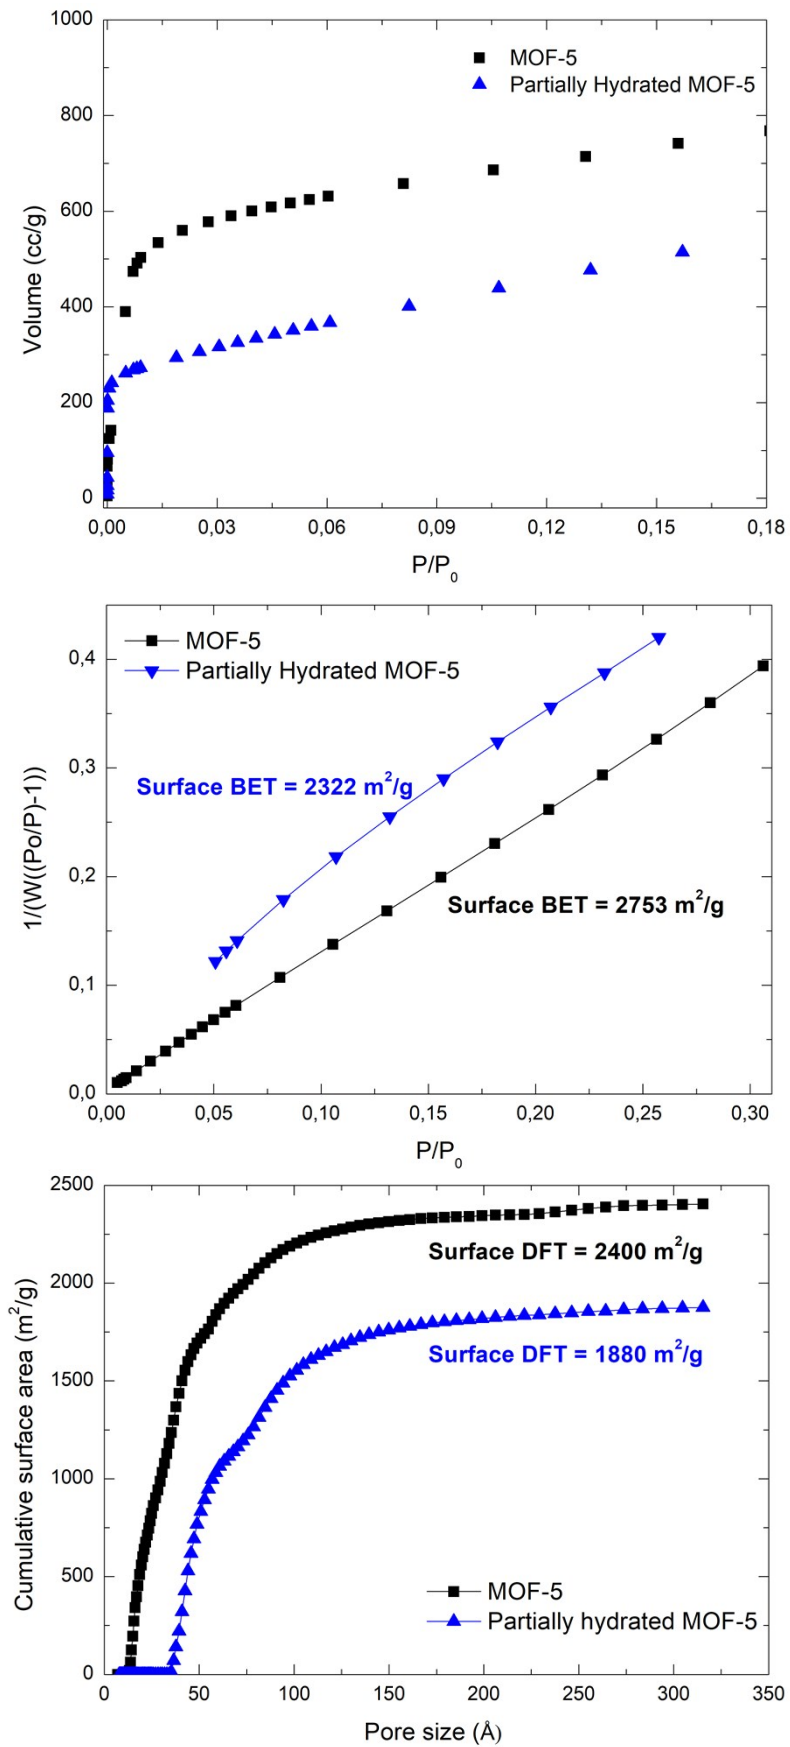

**Figure S3.** Isotherm (top), surface BET plot (middle) and cumulative surface area (bottom) of MOF-5 (black) and partially hydrated MOF-5 (blue)

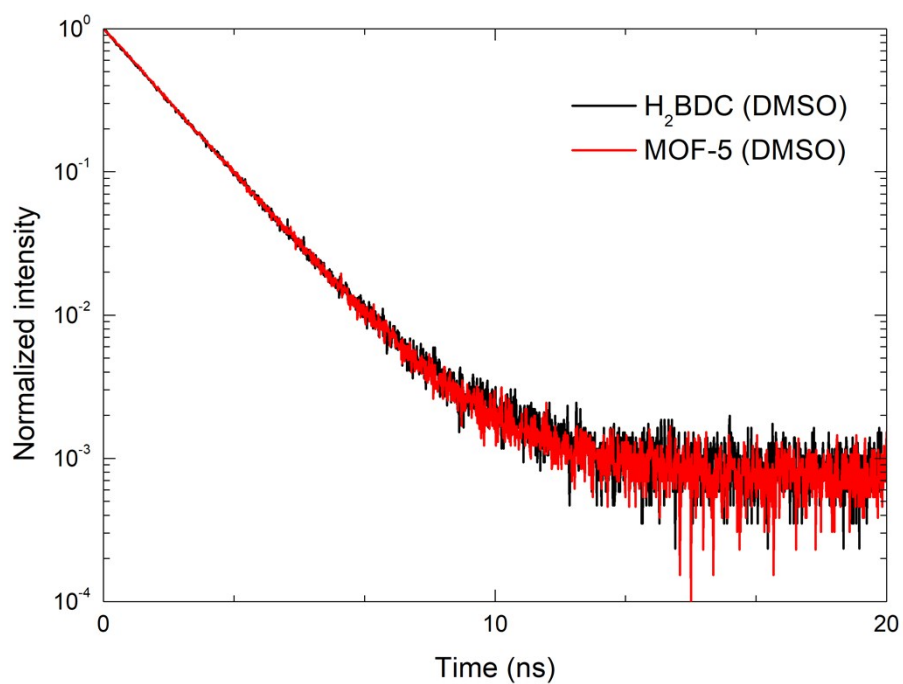

**Figure S4.** TCSPC of H<sub>2</sub>BDC dissolved in DMSO and MOF-5 impregnated with DMSO showing similar lifetime of 1.5 ns.

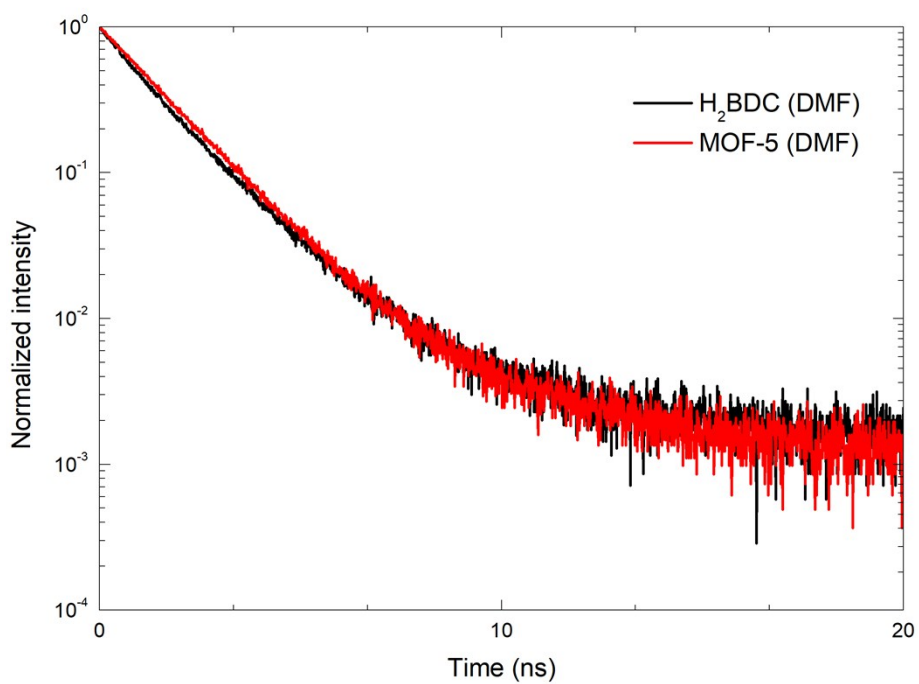

**Figure S5.** TCSPC of H<sub>2</sub>BDC dissolved in DMF and MOF-5 impregnated with DMF showing similar lifetime of 1.5 ns.



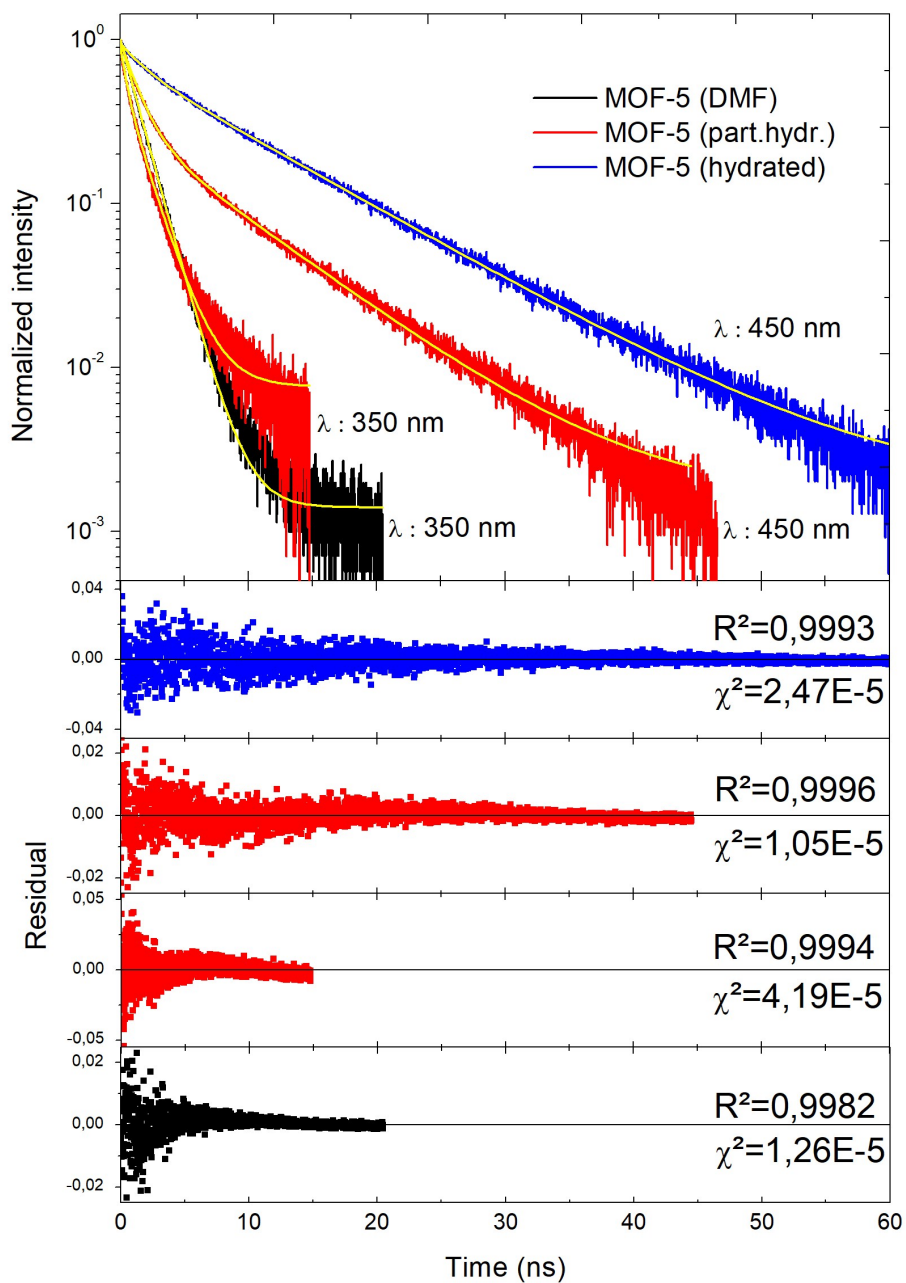

**Figure S6.** Decay time measurements of hydrated MOF-5 (blue), partially hydrated MOF-5 (red) observed at 350 and 450 nm and MOF-5 soaked in DMF (black).

|               | MOF-5 (DMF) | MOF-5 (part. hydr.) |               | MOF-5 (hydrated) |
|---------------|-------------|---------------------|---------------|------------------|
| $\tau_1$ (ns) | 1.5±0.1     | 1.5±0.1             | 1.4±0.1 (77%) | 1.8±0.1 (25%)    |
| $\tau_2$ (ns) | -           | -                   | 8.6±0.1 (23%) | 9.8±0.1 (75%)    |

**Table 2.** Associated lifetimes

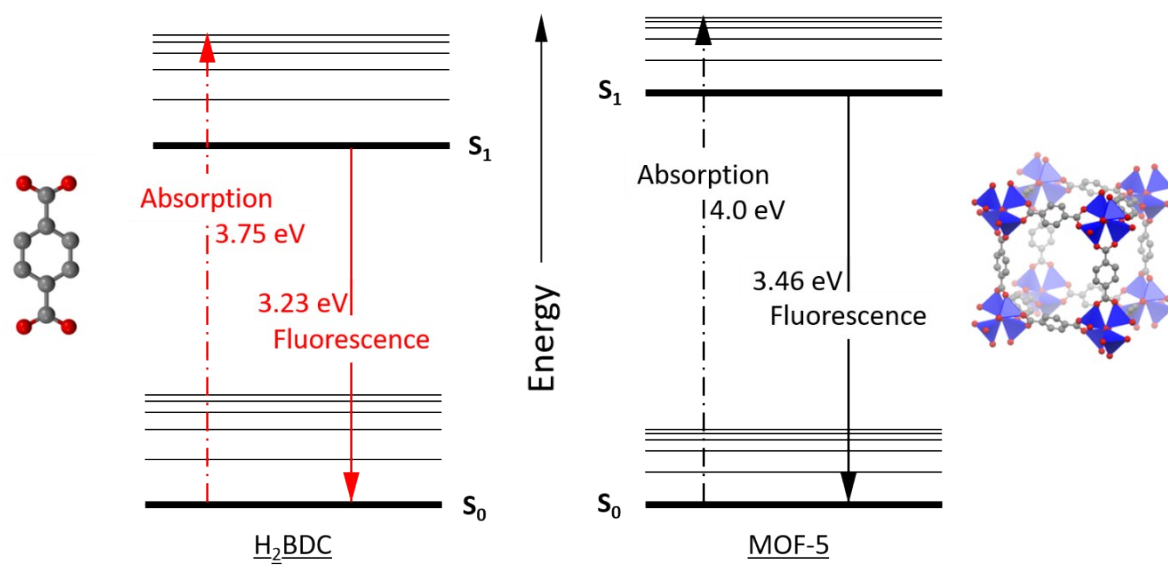

**Figure S7.** Perrin-Jablonsky diagram

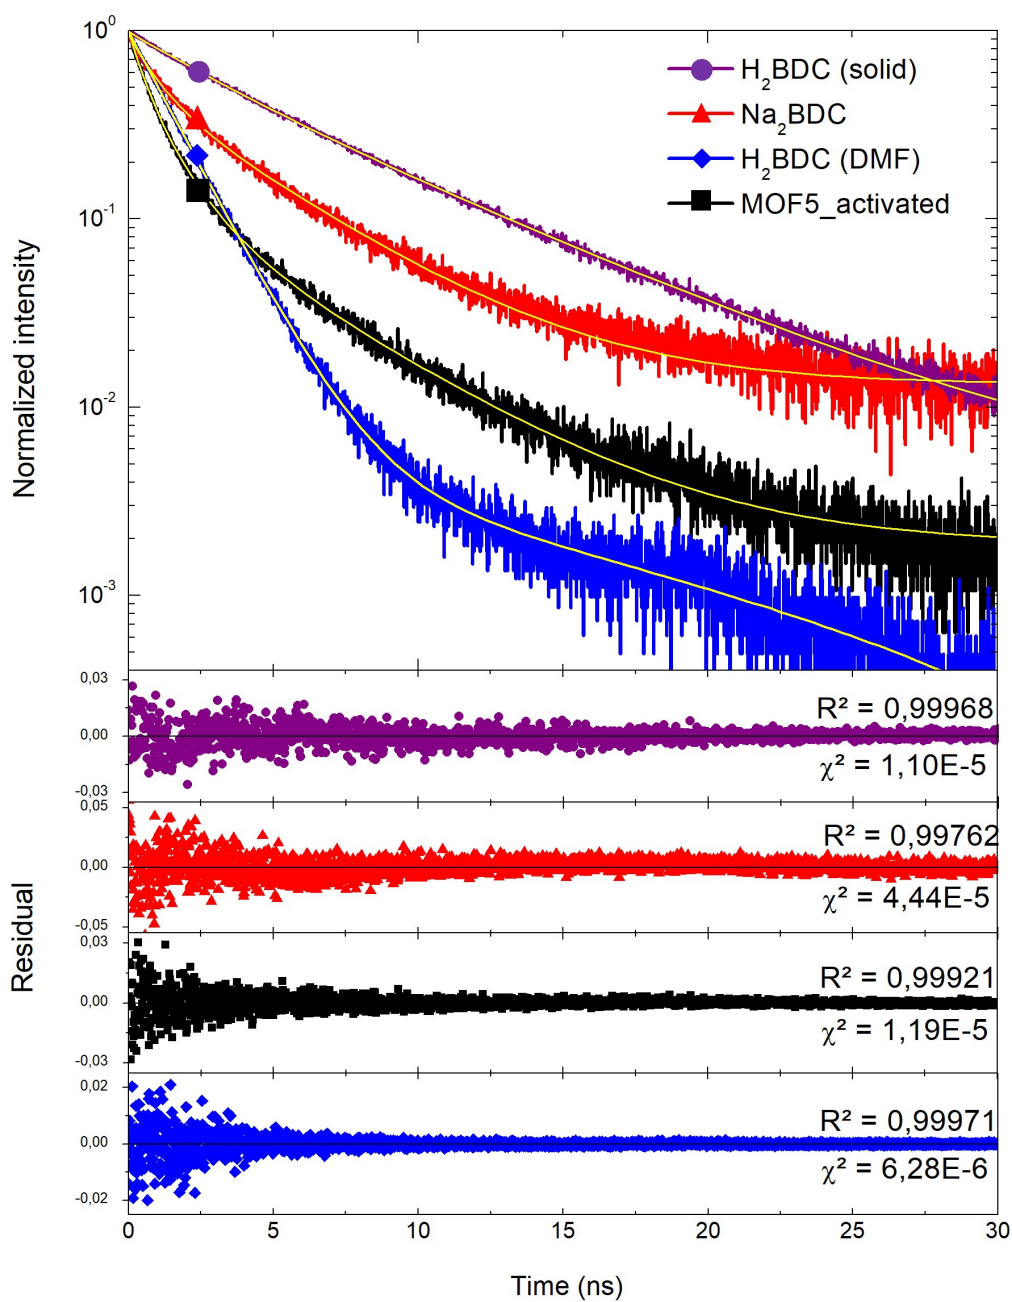

**Figure S8.** Decay time measurements of solid H<sub>2</sub>BDC (purple), Na<sub>2</sub>BDC (red), H<sub>2</sub>BDC dilute in DMF (black) and activated MOF-5 (blue).

|               | $\text{H}_2\text{BDC}$ (solid) | $\text{Na}_2\text{BDC}$ | $\text{H}_2\text{BDC}$ (DMF) | Activated MOF-5     |
|---------------|--------------------------------|-------------------------|------------------------------|---------------------|
| $\tau_1$ (ns) | $3.0 \pm 0.1$ (35%)            | $1.3 \pm 0.1$ (50%)     | $1.5 \pm 0.1$                | $1.4 \pm 0.1$ (77%) |
| $\tau_2$ (ns) | $6.7 \pm 0.1$ (65%)            | $4 \pm 0.1$ (50%)       | -                            | $4.5 \pm 0.1$ (23%) |

**Table 3.** Associated lifetimes

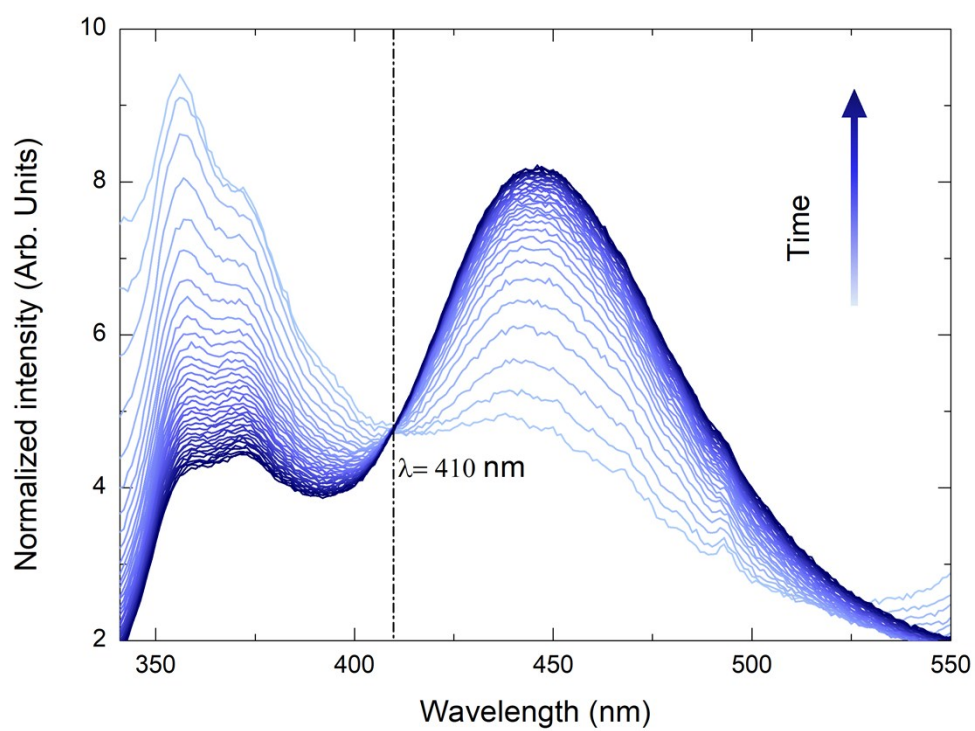

**Figure S9.** Surface normalized intensity showing an isobestic point at  $\lambda = 410 \text{ nm}$

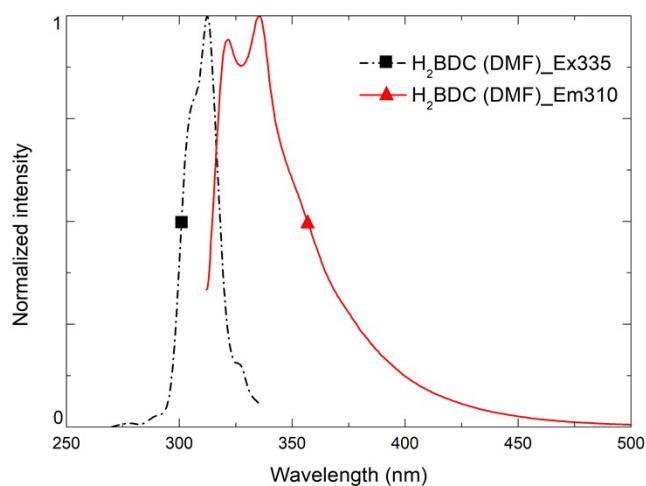

**Figure S10.** Excitation (dashed) and emission (straight) PL spectra of H2BDC diluted in DMF.

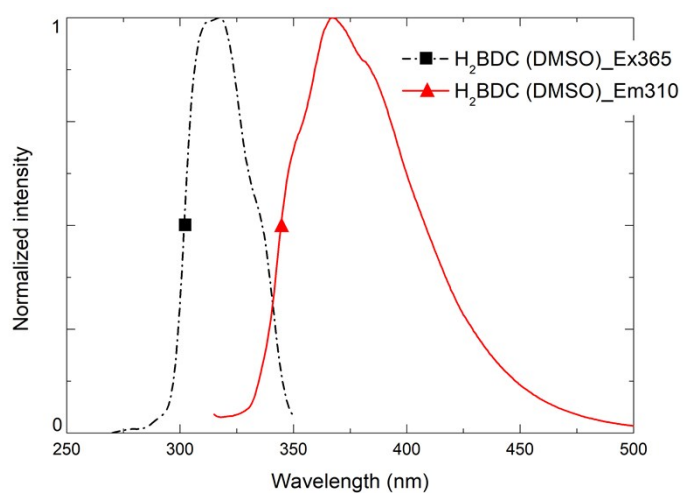

**Figure S11.** Excitation (dashed) and emission (straight) PL spectra of H2BDC diluted in DMSO.

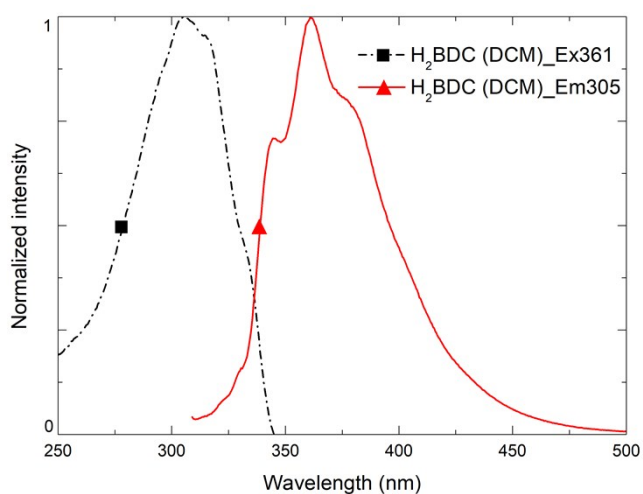

**Figure S12.** Excitation (dashed) and emission (straight) PL spectra of H2BDC diluted in DCM.
